# Supplementary material
Source: PubMed Central journal article supplement (PMC7093143)
Supplement: IAI.00886-19-s0001.pdf [file IAI.00886-19-s0001.pdf]

# FIG S1

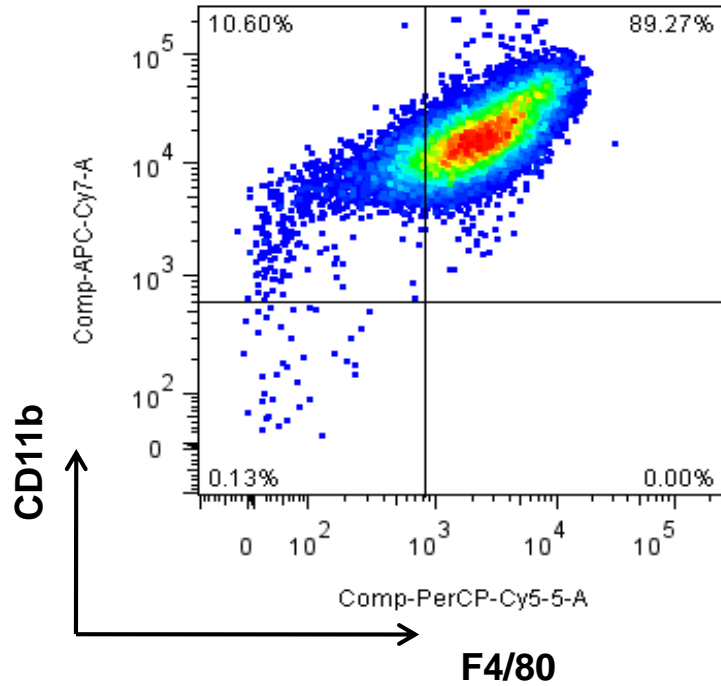

**FIG S1 Purity of BMMs were analyzed using anti-F4/80-PerCP-Cy5.5 and anti-CD11b-APC-Cy7 antibodies. Matured and fully differentiated BMMs are double positive for F4/80 and CD11b (top right quadrant).**
